# Supplementary material
Source: PubMed Central journal article supplement (PMC2695494)
Supplement: NIHMS51632-supplement-01.pdf [file NIHMS51632-supplement-01.pdf]

## Supplemental Data

### Vaccine Adjuvants Alter

### TCR-Based Selection Thresholds

Laurent Malherbe, Linda Mark, Nicolas Fazilleau, Louise J. McHeyzer-Williams, and Michael G. McHeyzer-Williams

#### Supplemental References

1. Samelson, L.E., Germain, R.N. and Schwartz, R.H. Monoclonal antibodies against the antigen receptor on a cloned T-cell hybrid. *Proc Natl Acad Sci U S A.* 80(22), 6972-6976 (1983).
2. Nakano, N., Rooke, R., Benoist, C. and Mathis, D. Positive selection of T cells induced by viral delivery of neopeptides to the thymus. *Science.* 275(5300), 678-683 (1997).
3. Liu, C.P., Parker, D., Kappler, J. and Marrack, P.J. Selection of antigen-specific T cells by a single I-Ek peptide combination. *J. Exp Med.* 186(9):1441-1450 (1997).

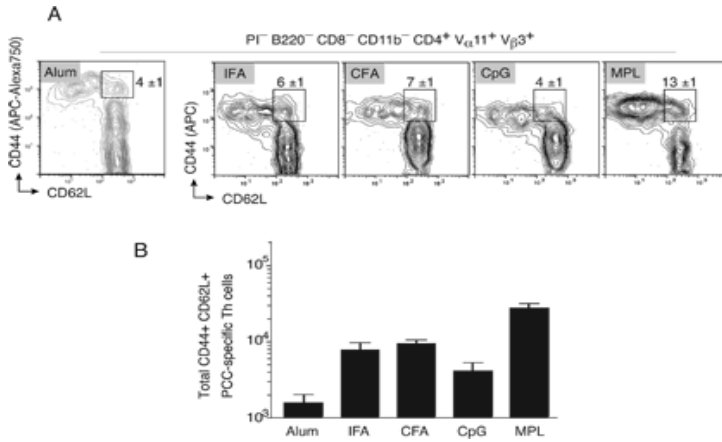

**Figure S1. Accumulation of CD44<sup>hi</sup>CD62L<sup>hi</sup> Antigen-Specific Th Cells across Different Adjuvants**

(a) As displayed in Figure 1, PCC-specific Th cells (V $\alpha$ 11<sup>+</sup>V $\beta$ 3<sup>+</sup>CD44<sup>hi</sup>CD62L<sup>hi</sup>) at day 7 in lymph nodes from B10.BR mice immunized with the indicated adjuvant. Profiles gated on propidium iodide (PI) negative cells that are CD4<sup>+</sup>B220<sup>-</sup>CD8<sup>-</sup>CD11b<sup>-</sup> and V $\alpha$ 11<sup>+</sup>V $\beta$ 3<sup>+</sup> as indicated with mean  $\pm$ SEM (n $\geq$ 3) percent of cells within insert box (b) Total number of CD44<sup>hi</sup>CD62L<sup>hi</sup> PCC-specific Th cells 7 days after immunization with Alum, IFA, CFA, CpG and MPL; means  $\pm$ SEM n $\geq$ 3 number of animals used is the same as in Figure 1.

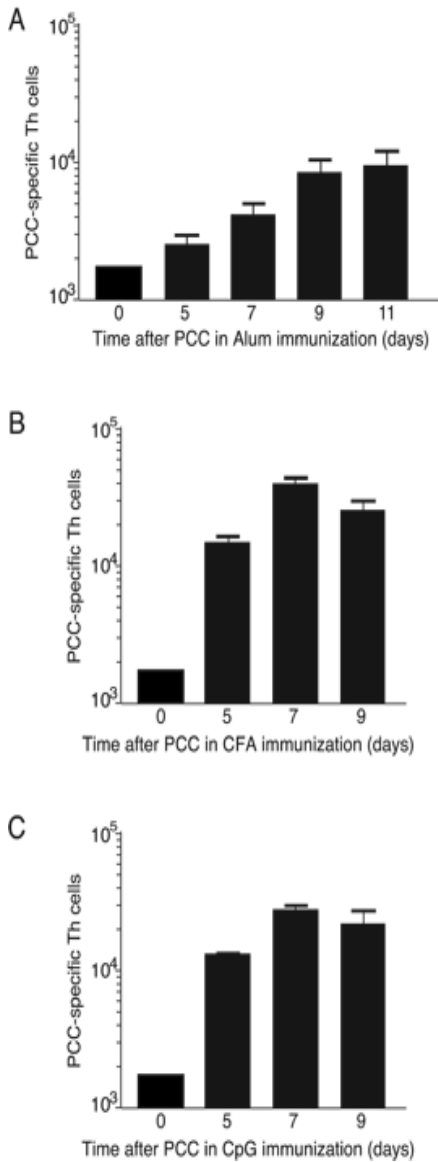

**Figure S2. Dynamics of Antigen-Specific Th Cell Response across Different Adjuvants**

Total number of PCC-specific Th cells 0, 5, 7, 9 and 11 days after immunization with (a) Alum and PCC and 0, 5, 7 and 9 days after immunization with (b) CFA or (c) CpG. Mean  $\pm$ SEM for at least three animals at each timepoint.



**Figure S3. Impact of Adjuvant on TCR $\alpha$  Chain Selection**

Ag-driven selection for preferred CDR3 features in  $\alpha$ -chain of the TCR. Single PCC-specific Th cells ( $V\alpha 11^+V\beta 3^+CD4^+CD44^{hi}CD62L^{lo}$ ) were sorted from draining lymph nodes of B10.BR mice immunized with PCC and the indicated adjuvant. Single-cell repertoire analysis was undertaken as described in Materials and Methods. Each dot represents the sequence information from a single-cell. The y-axis represents (a)  $J\alpha$  usage (b) CDR3 $\alpha$  length (c) aa present at position  $\alpha 93$  and (d)  $\alpha 95$ . The numbers of sequences used in the analysis are displayed (across 3 separate mice for each condition).

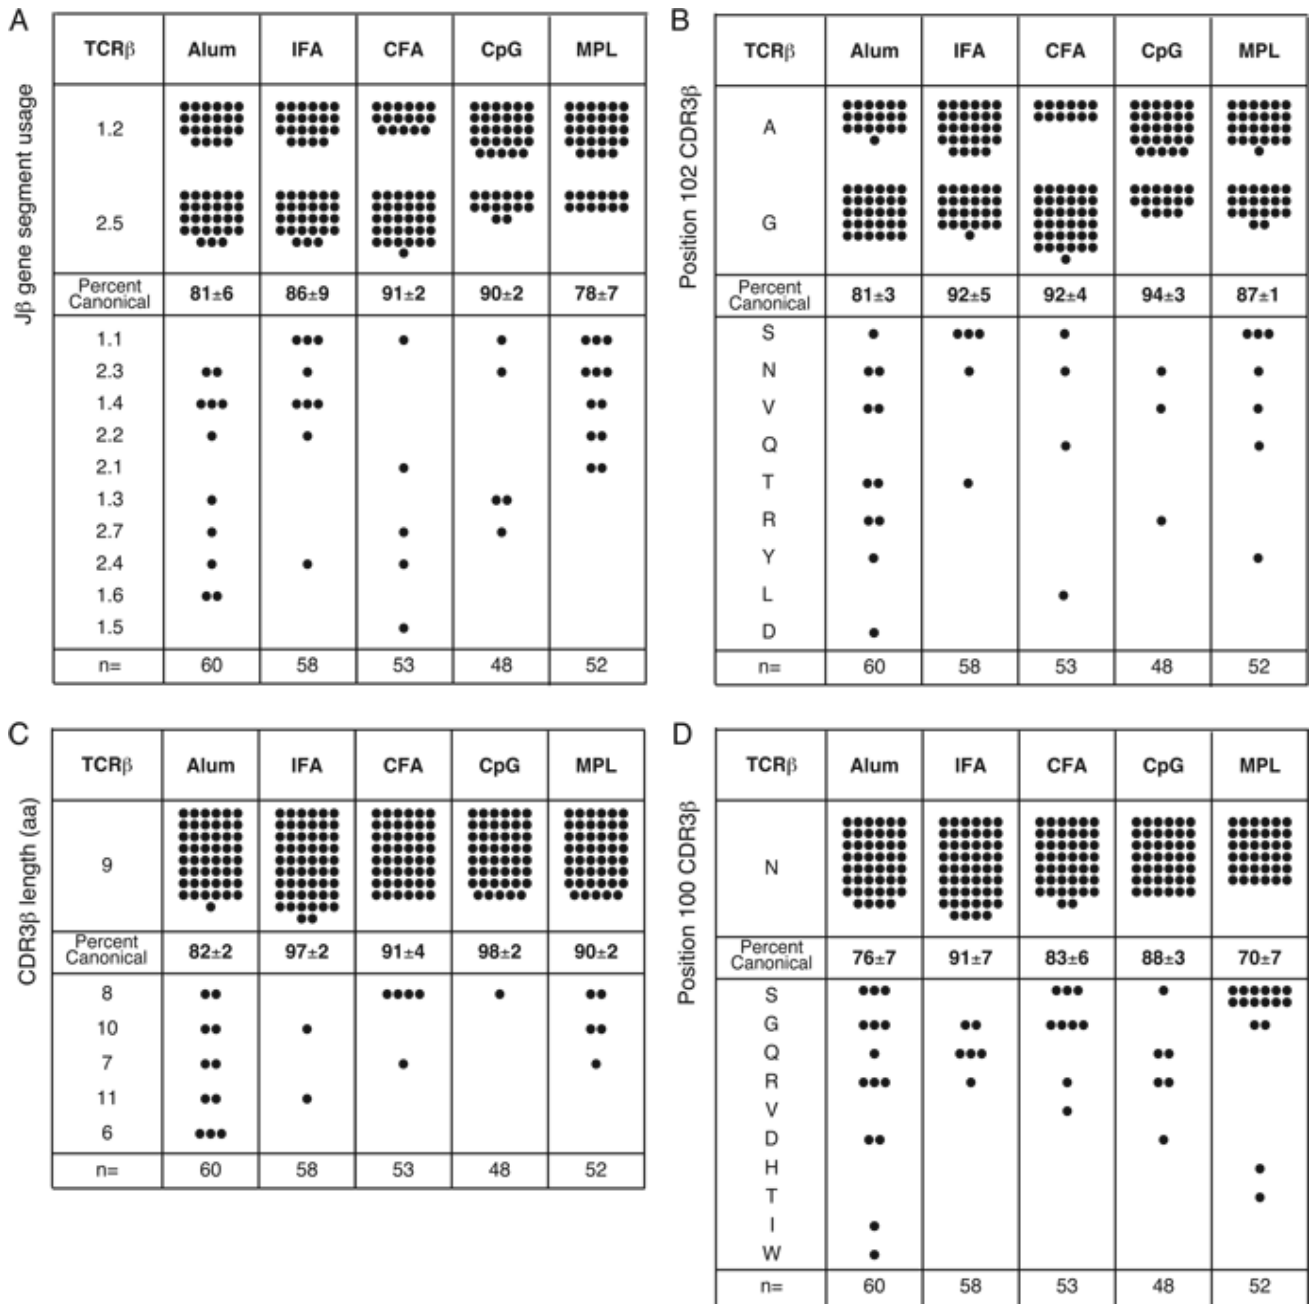

**Figure S4. Impact of Adjuvant on TCR $\beta$  Chain Selection**

Ag-driven selection for preferred CDR3 features in  $\beta$ -chain of the TCR. Single PCC-specific Th cells ( $V\alpha 11^+V\beta 3^+CD4^+CD44^{hi}CD62L^lo$ ) were sorted from draining lymph nodes of B10.BR mice immunized with PCC and the indicated adjuvant. Single-cell repertoire analysis was undertaken as described in Materials and Methods. Each dot

**Immunity, Volume 28**

represents the sequence information from a single-cell. The y-axis represents (a) J $\beta$  usage (b) aa present at position  $\beta$ 102 (c) the CDR3 $\beta$  length and (d) aa present at position  $\beta$ 100. The numbers of sequences used in the analysis are displayed (across 3 separate mice for each condition).

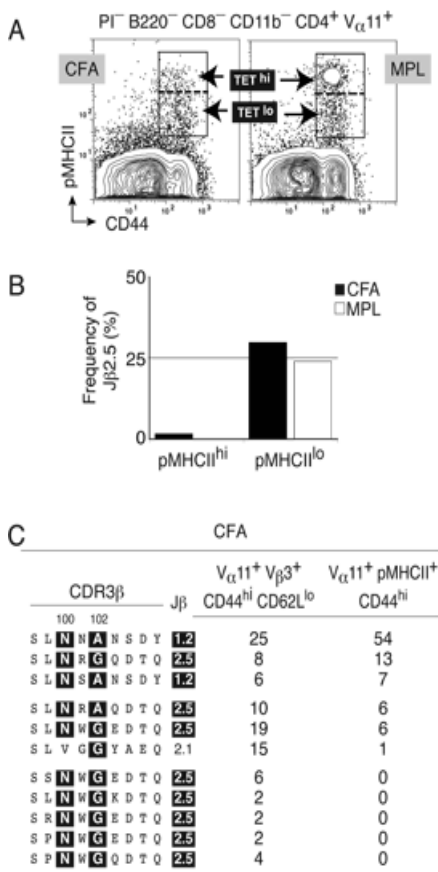

**Figure S5. pMHCII Labeling Discriminates Jβ Usage**

(a) Single CD4<sup>+</sup>V<sub>α</sub>11<sup>+</sup>pMHCII<sup>hi</sup>CD44<sup>hi</sup> (mfi>500) and CD4<sup>+</sup>V<sub>α</sub>11<sup>+</sup>pMHCII<sup>lo</sup>CD44<sup>hi</sup> (40<mfi<500) cells were sorted from mice immunized with CFA (left) or MPL-based adjuvant (right) and (b) the relative abundance of Jβ1.2 and Jβ2.5 gene segments was evaluated by single-cell PCR using Jβ specific primers (pMHCII<sup>hi</sup> CFA, n=3 with a total of 65 cells; pMHCII<sup>hi</sup> MPL, n=2 with a total of 61 cells; pMHCII<sup>lo</sup> CFA, n=2 with a total of 68 cells; pMHCII<sup>lo</sup> MPL, n=2 with a total of 42 cells). (c) Predicted amino acid sequences of CDR3β regions for CD4<sup>+</sup>V<sub>α</sub>11<sup>+</sup>V<sub>β</sub>3<sup>+</sup>CD44<sup>hi</sup>CD62L<sup>lo</sup> and CD4<sup>+</sup>V<sub>α</sub>11<sup>+</sup>pMHCII<sup>+</sup>CD44<sup>hi</sup> Th cells sorted from the same CFA immunized B10.BR mice. The sequences are sorted according to their relative enrichment using pMHCII tetramer staining.



| Hybridoma | V $\alpha$ 11 |    |          |    |    |    |    |     |     |     | J $\alpha$ | V $\beta$ 3  |    |          |     |          |     |     | J $\beta$ | Adjuvant | Reference  |     |   |
|-----------|---------------|----|----------|----|----|----|----|-----|-----|-----|------------|--------------|----|----------|-----|----------|-----|-----|-----------|----------|------------|-----|---|
|           | CDR3 $\alpha$ |    |          |    |    |    |    |     |     |     |            | CDR3 $\beta$ |    |          |     |          |     |     |           |          |            |     |   |
|           | 93            | 94 | 95       | 96 | 97 | 98 | 99 | 100 | 101 | 102 |            | 98           | 99 | 100      | 101 | 102      | 103 | 104 | 105       | 106      |            |     |   |
| 2B4       | L             | R  | V        | T  | G  | G  | N  | N   | K   | L   | 56         | S            | L  | <b>N</b> | W   | S        | Q   | D   | T         | Q        | <b>2.5</b> | CFA | 1 |
| 2C2       | L             | R  | V        | T  | G  | G  | N  | N   | K   | L   | 56         | S            | L  | <b>N</b> | W   | <b>G</b> | Q   | D   | T         | Q        | <b>2.5</b> | CFA | 1 |
| MCC2      | <b>E</b>      | A  | T        | G  | G  | Y  | K  | V   |     |     | 12         | S            | L  | <b>N</b> | R   | <b>G</b> | Q   | D   | T         | Q        | <b>2.5</b> | CFA | 2 |
| 15        | <b>E</b>      | G  | A        | G  | G  | Y  | K  | V   |     |     | 12         | S            | L  | <b>N</b> | R   | <b>G</b> | Q   | D   | T         | Q        | <b>2.5</b> | CFA | 2 |
| 8         | <b>E</b>      | A  | <b>S</b> | G  | S  | W  | Q  | L   |     |     | 22         | S            | L  | <b>N</b> | R   | <b>G</b> | Q   | D   | T         | Q        | <b>2.5</b> | CFA | 2 |
| 1         | <b>E</b>      | P  | G        | G  | N  | N  | K  | L   |     |     | 56         | S            | L  | <b>N</b> | W   | <b>G</b> | Q   | D   | T         | Q        | <b>2.5</b> | CFA | 2 |
| KMAC-92   | G             | A  | <b>S</b> | S  | F  | N  | K  | L   |     |     | 4          | S            | L  | <b>N</b> | W   | <b>G</b> | G   | D   | T         | Q        | <b>2.5</b> | CFA | 3 |

**Figure S6. PCC-Specific Hybridomas Expressing TCR $\beta$  Using J $\beta$ 2.5**

CDR3 $\alpha$  and CDR3 $\beta$  regions of TCR sequences from known PCC-specific hybridomas using J $\beta$ 2.5. Columns (left to right): hybridoma designation; CDR3  $\alpha$ , with positions  $\alpha$ 93E and  $\alpha$ 95S ‘highlighted’ in black as canonical, and motif length; J  $\alpha$  gene segment usage; CDR3 $\beta$ , with positions  $\beta$ 100N and  $\beta$ 102G ‘highlighted’ in black as canonical, and motif length; J $\beta$  gene segment usage; adjuvant used to promote PCC-specific Th cell response and isolate T cell hybridomas.
